# Supplementary material for: Spatial distribution of child pedestrian injuries along census tract boundaries: Implications for identifying area-based correlates
Source: PLoS One. 2017 Jun 14;12(6):e0179331. doi: 10.1371/journal.pone.0179331 (PMC5470688; doi:10.1371/journal.pone.0179331)
Supplement: S1 File — The records listed in this file can be accessed online: http://online.akronohio.gov/apdonline/reportlookup/EULA.aspx?referrer=ReportLookup. (XLSX) [file pone.0179331.s001.xlsx]

## Sheet: Minimal_Dataset
Report Number	Data for reports is available for public access through the following URL: http://online.akronohio.gov/apdonline/reportlookup/EULA.aspx?referrer=ReportLookup
T13000163
T13000231
T13000235
T13000255
T13000407
T13001228
T13001481
T13002039
T13002121
T13002174
T13002257
T13002346
T13002544
T13002989
T13003372
T13003390
T13003458
T13003638
T13003677
T13004159
T13004185
T13004234
T13004544
T13004643
T13005862
T13006106
T13006392
T13006455
T13006495
T13007317
T14000934
T14001012
T14001710
T14001771
T14002268
T14002468
T14002586
T14003089
T14003175
T14003179
T14003469
T14003761
T14003961
T14003971
T14003973
T14004036
T14004323
T14004366
T14004514
T14004650
T14005100
T14005417
T14005914
T14006188
T14006201
T14006359
T14006686
T14007246
T14007276
T14007332
T15000461
T15000477
T15000500
T15000515
T15000844
T15000989
T15001442
T15001887
T15002666
T15002860
T15002887
T15002979
T15003224
T15003404
T15003510
T15003641
T15003801
T15004332
T15004379
T15004393
T15004478
T15004999
T15005205
T15005473
T15005587
T15005588
T15006239
T15006315
T15006338
T15006526
T15006632
T15006665
T15006814
T15006838
T15006962
T15007392
T15007661
T15007828
T15007854
T15008170
